# Supplementary material
Source: PubMed Central journal article supplement (PMC6719784)
Supplement: NIHMS1043970-supplement-1.pdf [file NIHMS1043970-supplement-1.pdf]

**SUPPLEMENTARY INFORMATION for**  
**MISTRG mice support engraftment and assessment of**  
**nonhuman primate hematopoietic stem and progenitor cells**

**Authors:** Stefan Radtke<sup>a</sup>, Yan-Yi Chan<sup>a</sup>, Trisha R. Sippel<sup>b</sup>, Hans-Peter Kiem<sup>a,c,d\*</sup>,  
Anthony Rongvaux<sup>b,e\*</sup>

**LIST OF SUPPLEMENTARY ITEMS:**

1. **Supplementary Table E1.** Annotations for amino acid sequences from UniProtKB/Swiss-Prot
2. **Supplementary Table E2.** Fluorochrome-conjugated antibodies used for flowcytometry and cell sorting
3. **Supplementary Figure E1: Longitudinal tracking of NHP multilineage engraftment in the PB of MISTRG mice.**

**Supplementary Table E1. Annotations for amino acid sequences from UniProtKB/Swiss-Prot**

|               | <b>Mouse</b> | <b>Human</b> | <b>Pigtail</b> |
|---------------|--------------|--------------|----------------|
| <b>IL3</b>    | P01586       | P08700       | A0A2K6DUD8     |
| <b>M-CSF</b>  | P01587       | P04141       | A0A2K6CV13     |
| <b>GM-CSF</b> | P07141       | P09603       | A0A2K6CXU2     |
| <b>TPO</b>    | P35419       | P07202       | A0A2K6E494     |
| <b>CD47</b>   | Q61735       | Q08722       | A0A2K6DDL9     |
| <b>SIRPA</b>  | P97797       | P78324       | H9FQ76*        |

\*Rhesus Mulatta (*Macaca nemestrina* sequence not available)

**Supplementary Table E2.** Fluorochrome-conjugated antibodies used for flowcytometry and cell sorting

| <b>Epitope</b> | <b>Clone</b> | <b>Company</b> | <b>NHP</b> | <b>MU</b> |
|----------------|--------------|----------------|------------|-----------|
| CD3            | SP34-2       | BD Biosciences | X          |           |
| CD4            | L200         | BD Bioscience  | X          |           |
| CD8a           | RPA-T8       | eBioscience    | X          |           |
| CD11b          | ICRF44       | BioLegend      | X          |           |
| CD14           | 63D3         | eBioscience    | X          |           |
| CD16           | 3G8          | BioLegend      | X          |           |
| CD20           | 2H7          | BioLegend      | X          |           |
| CD34           | 563          | BD Biosciences | X          |           |
| CD45           | D058-1283    | BD Biosciences | X          |           |
|                | 30-F11       | eBioscience    |            | X         |
| CD45RA         | 5H9          | BD Biosciences | X          |           |
| CD90           | 5E10         | BD Biosciences | X          |           |

*NHP: nonhuman primate; MU: murine*

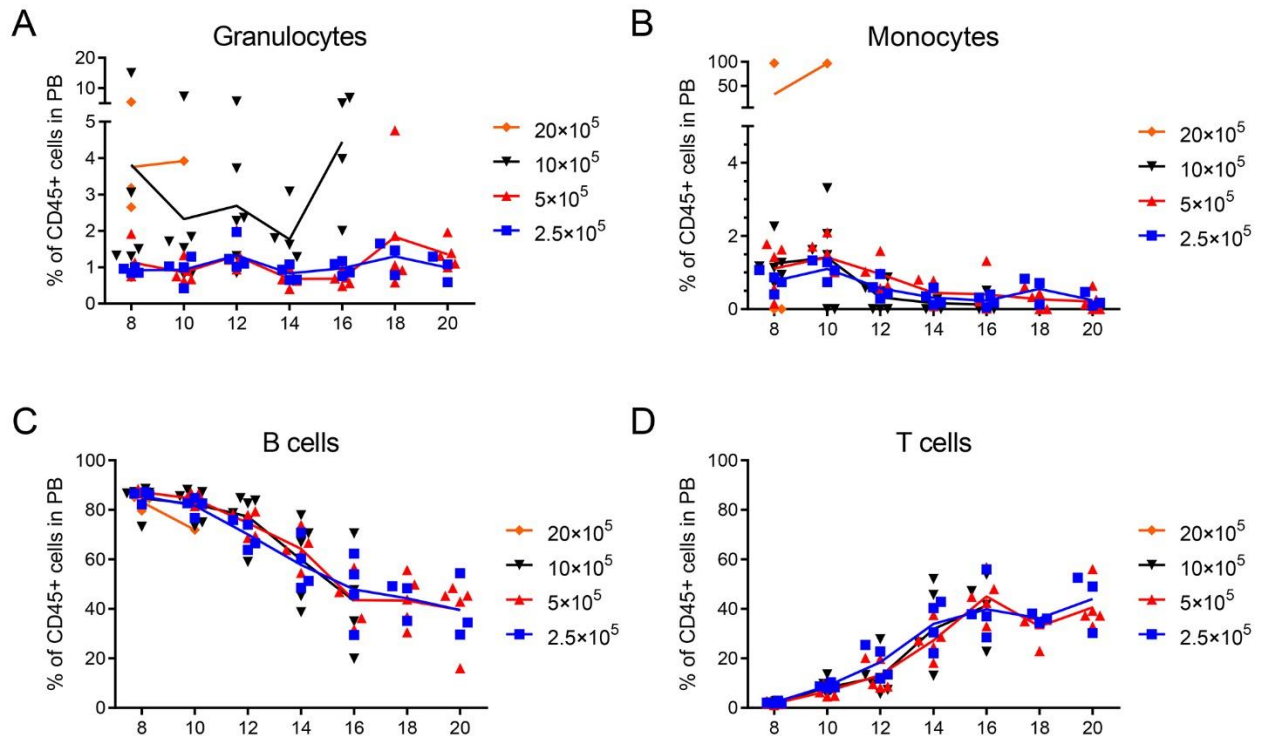

**Supplementary Figure E1: Longitudinal tracking of NHP multilineage engraftment in the PB of MISTRG mice.** Frequency of NHP (A) granulocytes (CD11b<sup>+</sup>CD14<sup>-</sup>), (B) monocytes (CD11b<sup>+</sup>CD14<sup>+</sup>), (C) B cells (CD20<sup>+</sup>) and (D) T cells (sum of CD4<sup>+</sup>/CD8<sup>+</sup>/CD4<sup>+</sup>CD8<sup>+</sup>) in the PB over time after intra-hepatic injection of different NHP CD34<sup>+</sup> cell doses (as indicated in figure legend) into sub-lethally irradiated neonatal MISTRG mice.
